# Supplementary material for: EXP2SL: A Machine Learning Framework for Cell-Line-Specific Synthetic Lethality Prediction
Source: PubMed Central journal article supplement (PMC7058988; doi:10.3389/fphar.2020.00112), 2020-02-28
Supplement: DataSheet_1.pdf [file DataSheet_1.pdf]

## Supplementary Material for

### EXP2SL: a Machine Learning Framework for Cell-Line Specific Synthetic Lethality Prediction

#### 1 SUPPLEMENTARY METHOD

##### 1.1 The implementation of EXP2SL with the PPI network incorporated by a graph convolution module

We use the same notations as in the main text, that is, the indices  $1, 2, \dots, N$  stand for the  $N$  genes with shRNA data from the LINCS L1000 project (Subramanian et al., 2017) in a given cell line. The L1000 gene expression profiles are denoted by  $\{\mathbf{f}_i \in \mathbb{R}^{978}\}_{i=1}^N$ . In addition, a corresponding PPI matrix  $\mathbf{P} \in \mathbb{R}^{N \times N}$  is used to represent the connectivities between these genes. Here,  $P_{i,j} = 1$  denotes the existence of an interaction between genes  $i$  and  $j$ , and  $P_{i,j} = 0$  otherwise. The PPI network information is obtained from the STRING database (Szklarczyk et al., 2014), the same as in NetLapRLS as described in the main text.

For a given cell line, our model takes both gene L1000 expression profiles  $\{\mathbf{f}_i\}_{i=1}^N$  and the PPI network  $\mathbf{P}$  as inputs and processes them through three steps to predict the potential SL pairs between genes (Figure S1).

**Step 1: a low-dimensional encoder.** The gene features (*i.e.*, the L1000 expression profiles) are first transformed into the low-dimensional hidden representations  $\{\mathbf{h}_i^0 \in \mathbb{R}^d\}_{i=1}^N$  through a single layer neural network, that is,

$$\mathbf{h}_i^0 = \text{ReLU}(\mathbf{W}_{\text{encoder}} \mathbf{f}_i + \mathbf{b}_{\text{encoder}}), \quad (\text{S1})$$

where  $\text{ReLU}(x)$  stands for the rectifier linear activation function  $\text{ReLU}(x) = \max(0, x)$ ,  $\mathbf{W}_{\text{encoder}} \in \mathbb{R}^{d \times 978}$  and  $\mathbf{b}_{\text{encoder}} \in \mathbb{R}^d$  ( $d < 978$ ) denote the learnable parameters and  $i \in \{1, 2, \dots, N\}$ .

**Step 2: a graph convolution network.** Next, a graph convolution network is adopted to enable information passing through the PPI network to update the features for each gene. Suppose that the number of graph convolution iterations is  $G$ . At the beginning of graph convolution, the initial representations of genes are  $\{\mathbf{h}_i^0\}_{i=1}^N$ . At  $g$ -th iteration ( $g = 1, 2, \dots, G$ ), the neighborhood information  $\mathbf{m}_i^g$  passed to gene  $i$  through the PPI network is defined as:

$$\mathbf{m}_i^g = \alpha_i \sum_{j=1}^N P_{i,j} \cdot \text{ReLU}(\mathbf{W}_{\text{ppi}}^g \mathbf{h}_i^{g-1} + \mathbf{b}_{\text{ppi}}^g), \quad (\text{S2})$$

where  $\alpha_i = \frac{1}{\sum_{j=1}^N P_{i,j}}$  stands for the PPI normalization term, and  $\mathbf{W}_{\text{ppi}}^g \in \mathbb{R}^{d \times d}$  and  $\mathbf{b}_{\text{ppi}}^g \in \mathbb{R}^d$  are the learnable parameters.

Then, the passed information  $\mathbf{m}_i^g$  is used to update the gene features through a gated recurrent unit (GRU) (Lei et al., 2018), that is,

$$\mathbf{h}_i^g = \text{GRU}(\mathbf{m}_i^g, \mathbf{h}_i^{g-1}), \quad (\text{S3})$$

where  $\text{GRU}(\mathbf{x}, \mathbf{y})$  is defined as

$$\text{GRU}(\mathbf{x}, \mathbf{y}) = (1 - z)\mathbf{y} + z\hat{\mathbf{y}}, \quad (\text{S4})$$

$$\hat{\mathbf{y}} = \tanh(\mathbf{W}_x \mathbf{x} + \mathbf{b}_x + r(\mathbf{W}_y \mathbf{y} + \mathbf{b}_y)), \quad (\text{S5})$$

$$z = \sigma(\mathbf{W}_z [\mathbf{x}, \mathbf{y}] + \mathbf{b}_z), \quad (\text{S6})$$

$$r = \sigma(\mathbf{W}_r [\mathbf{x}, \mathbf{y}] + \mathbf{b}_r). \quad (\text{S7})$$

Here,  $z$  and  $r$  stand for the update and reset gates, respectively,  $\mathbf{W}_x, \mathbf{W}_y \in \mathbb{R}^{d \times d}$ ,  $\mathbf{b}_x, \mathbf{b}_y, \mathbf{b}_z, \mathbf{b}_r \in \mathbb{R}^d$ ,  $\mathbf{W}_z, \mathbf{W}_r \in \mathbb{R}^{d \times 2d}$  denote the learnable parameters,  $\tanh(\cdot)$  denotes the hyperbolic tangent activation function,  $\sigma(x) = \frac{1}{1+e^{-x}}$  denotes the sigmoid activation function, and  $[\cdot, \cdot]$  denotes the concatenation operation.

**Step 3: a linear layer.** After  $L$  iterations of graph convolution, the updated gene features  $\{\mathbf{h}_i^L\}_{i=1}^N$  are then used to predict SL interactions, in the same way as described in the main text. That is, for a gene pair  $(i, j)$ ,  $i, j = 1, 2, \dots, N$  and  $i \neq j$ , the predicted confidence score is calculated by

$$s_{i,j} = \frac{1}{2}(\mathbf{W}_{out}[\mathbf{h}_i^L, \mathbf{h}_j^L] + \mathbf{W}_{out}[\mathbf{h}_j^L, \mathbf{h}_i^L]) + \mathbf{b}_{out}, \quad (\text{S8})$$

where  $\mathbf{W}_{out} \in \mathbb{R}^{1 \times 2d}$  and  $\mathbf{b}_{out} \in \mathbb{R}$  stand for the learnable parameters.

## 2 SUPPLEMENTARY TABLES AND FIGURES

### 2.1 Figures

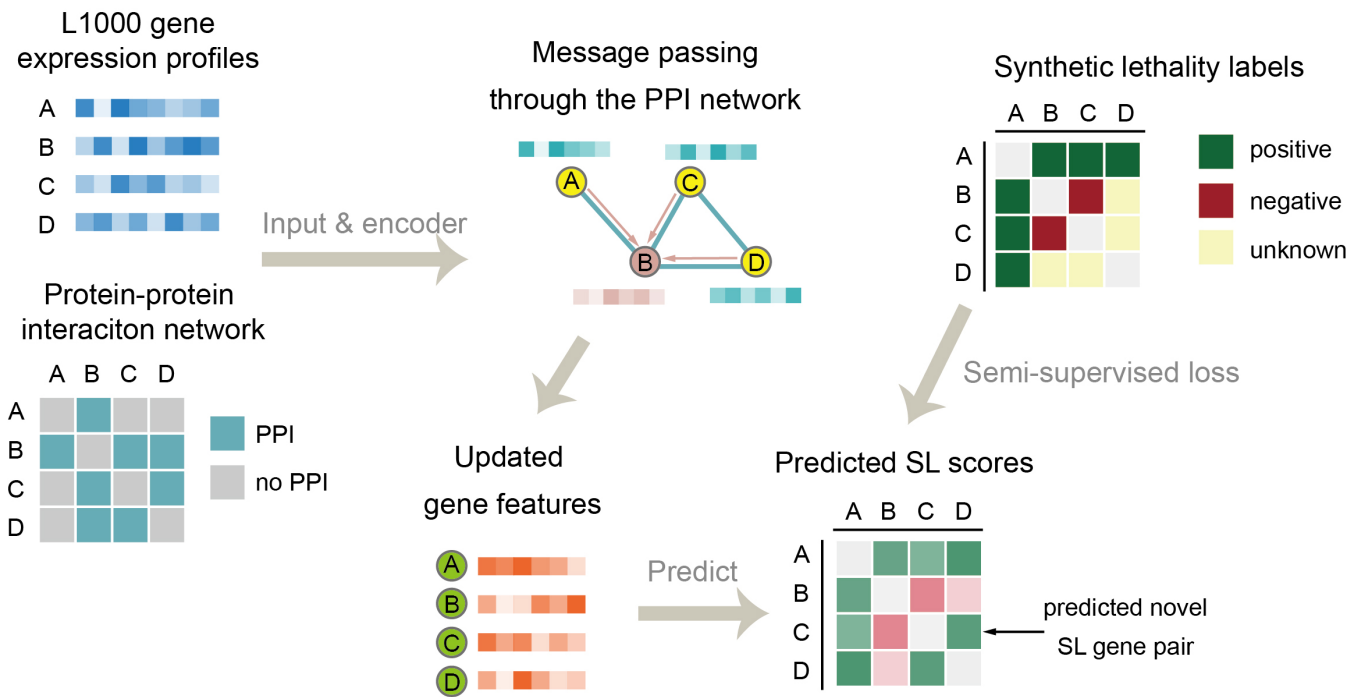

**Figure S1.** The work flow of EXP2SL method with the PPI incorporated by a graph convolution module.

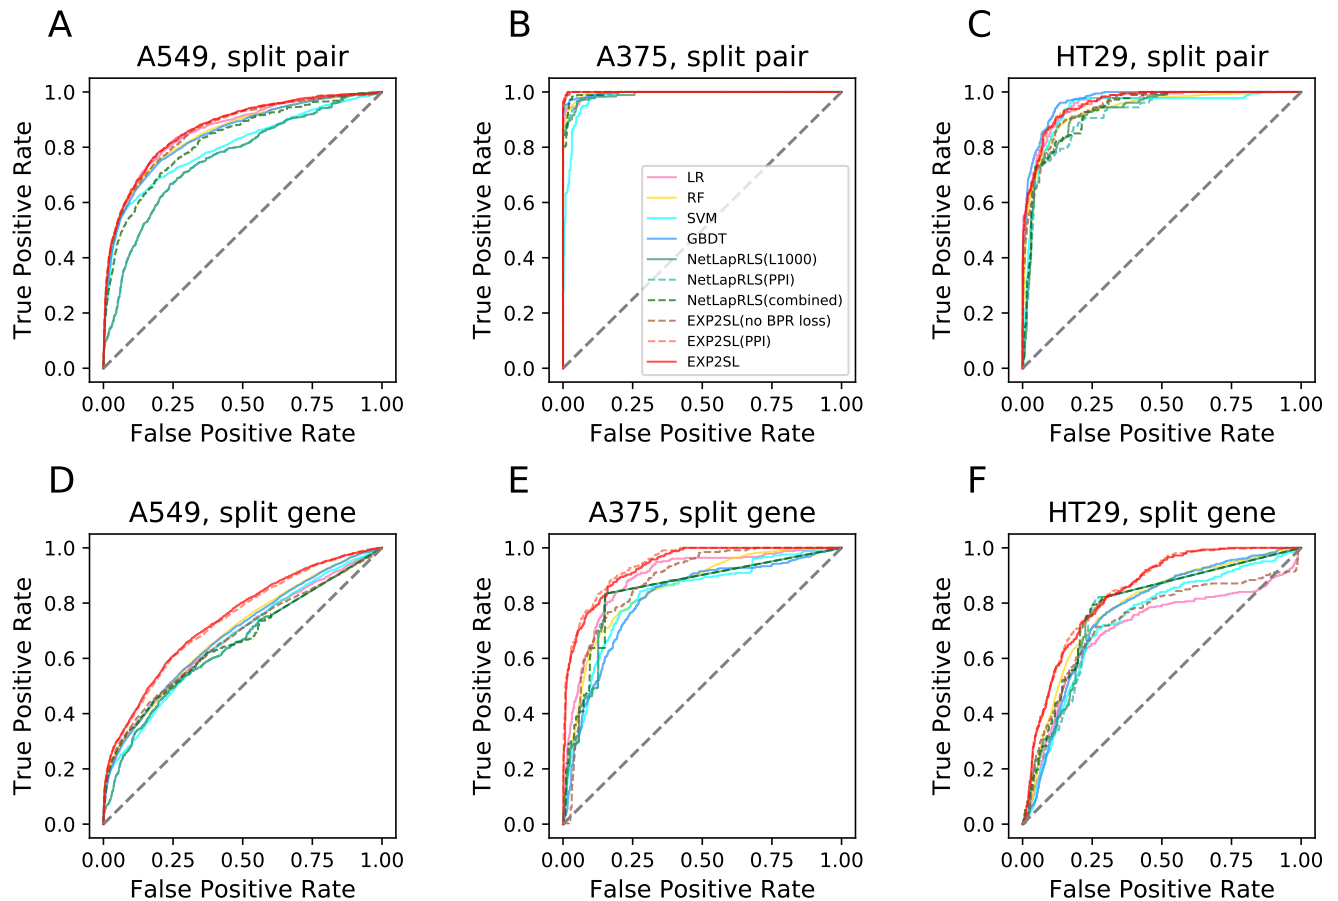

**Figure S2.** The receiver operator characteristic (ROC) curves achieved by EXP2SL and the baseline methods. Combined predictions over ten repeats of five cross-validations were evaluated for cell line A549 (A, D), A375 (B, E) and HT29 (C, F) under the “split gene” (A-C) and the “split pair” (D-F) settings are shown. The NetLapRLS models using only the L1000 similarities, only the PPI similarities and the combination of L1000 and PPI similarities are marked as “NetLapRLS(L1000)”, “NetLapRLS(PPI)” and “NetLapRLS(combined)”, respectively. The EXP2SL model without the BPR loss and with additional PPI information incorporated by a graph convolution module are marked as “EXP2SL(no BPR loss)” and “EXP2SL(PPI)”, respectively.

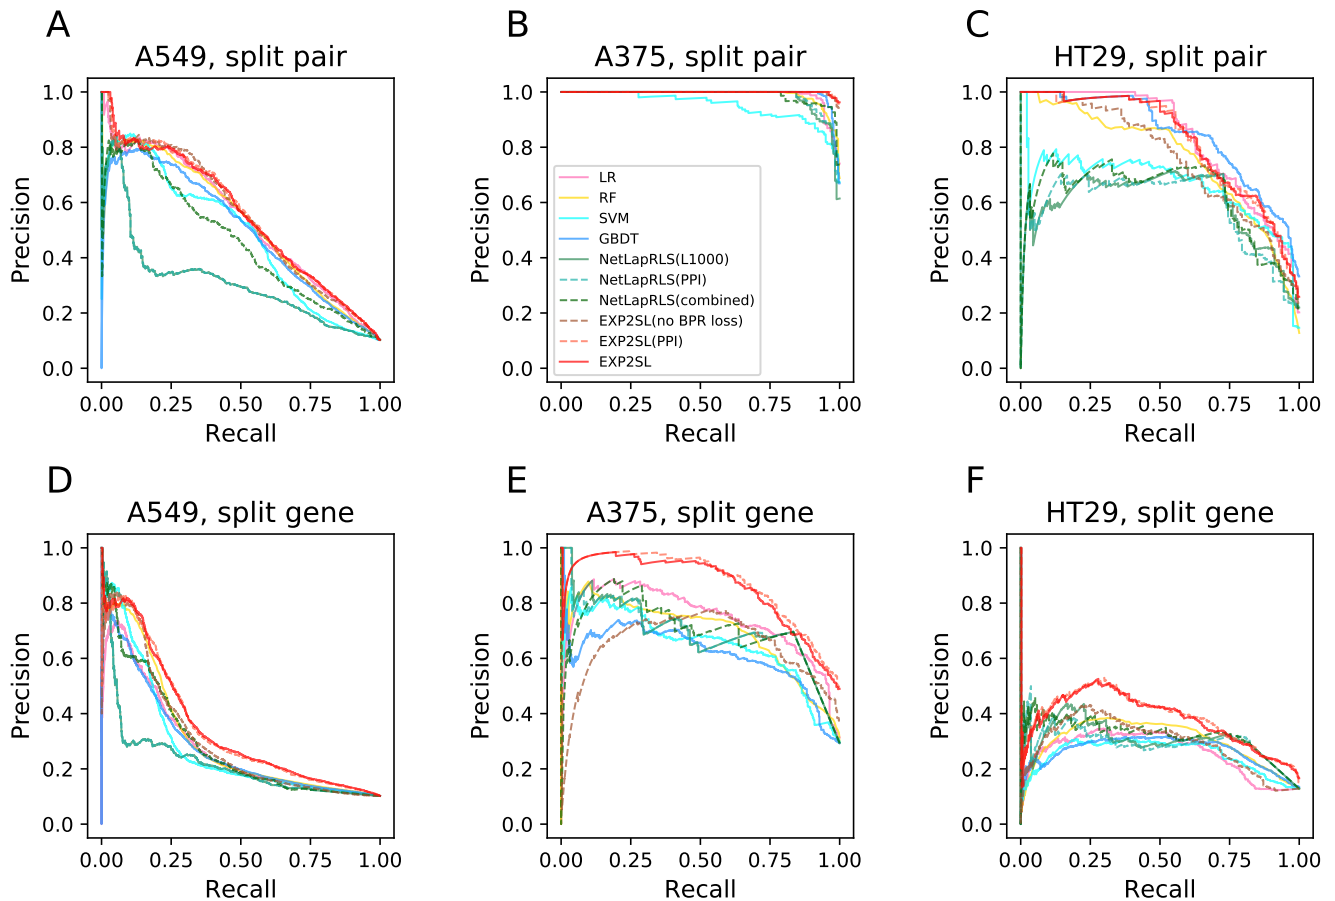

**Figure S3.** The precision-recall (PR) curves achieved by EXP2SL and the baseline methods. Combined predictions over ten repeats of five cross-validations were evaluated for cell line A549 (A, D), A375 (B, E) and HT29 (C, F) under the “split gene” (A-C) and the “split pair” (D-F) settings are shown. The NetLapRLS models using only the L1000 similarities, only the PPI similarities and the combination of L1000 and PPI similarities are marked as “NetLapRLS(L1000)”, “NetLapRLS(PPI)” and “NetLapRLS(combined)”, respectively. The EXP2SL model without the BPR loss and with additional PPI information incorporated by a graph convolution module are marked as “EXP2SL(no BPR loss)” and “EXP2SL(PPI)”, respectively.

## 2.2 Tables

**Table S1.** Performance evaluation in three different cell lines under the “split pair” setting, with labels selected by threshold 10%. The mean and standard deviation (in brackets) of each metrics over 10 repeats are shown. The best results for each cell line and each metric are marked in bold.

| Dataset | Model name                       | AUC                  | AUPR                 | F1                   | Accuracy             | Precision            | Sensitivity          | Specificity          |
|---------|----------------------------------|----------------------|----------------------|----------------------|----------------------|----------------------|----------------------|----------------------|
| A549    | LR                               | 0.849 (0.041)        | 0.646 (0.075)        | 0.625 (0.056)        | 0.852 (0.047)        | 0.615 (0.096)        | 0.648 (0.047)        | 0.900 (0.063)        |
|         | RF                               | 0.843 (0.040)        | 0.631 (0.072)        | 0.622 (0.051)        | 0.853 (0.038)        | 0.628 (0.078)        | 0.632 (0.040)        | 0.905 (0.049)        |
|         | SVM                              | 0.799 (0.041)        | 0.567 (0.072)        | 0.575 (0.054)        | 0.846 (0.041)        | 0.620 (0.093)        | 0.547 (0.039)        | <b>0.917 (0.052)</b> |
|         | GBDT                             | 0.844 (0.040)        | 0.618 (0.073)        | 0.616 (0.050)        | 0.843 (0.034)        | 0.591 (0.075)        | 0.658 (0.040)        | 0.886 (0.041)        |
|         | NetLapRLS(L1000) <sup>1</sup>    | 0.784 (0.035)        | 0.533 (0.071)        | 0.529 (0.052)        | 0.782 (0.027)        | 0.471 (0.059)        | 0.638 (0.056)        | 0.816 (0.028)        |
|         | NetLapRLS(PPI) <sup>2</sup>      | 0.730 (0.042)        | 0.418 (0.072)        | 0.472 (0.053)        | 0.733 (0.039)        | 0.387 (0.079)        | 0.626 (0.032)        | 0.757 (0.047)        |
|         | NetLapRLS(combined) <sup>3</sup> | 0.796 (0.043)        | 0.552 (0.074)        | 0.550 (0.054)        | 0.797 (0.039)        | 0.493 (0.087)        | 0.646 (0.038)        | 0.833 (0.049)        |
|         | EXP2SL(no BPR loss) <sup>4</sup> | 0.853 (0.039)        | <b>0.652 (0.070)</b> | <b>0.629 (0.054)</b> | <b>0.856 (0.056)</b> | <b>0.631 (0.095)</b> | 0.639 (0.052)        | 0.908 (0.077)        |
|         | EXP2SL(PPI) <sup>5</sup>         | <b>0.855 (0.040)</b> | 0.650 (0.071)        | 0.626 (0.047)        | 0.848 (0.039)        | 0.602 (0.075)        | <b>0.666 (0.041)</b> | 0.891 (0.050)        |
| EXP2SL  | 0.853 (0.035)                    | 0.646 (0.067)        | 0.625 (0.046)        | 0.851 (0.040)        | 0.613 (0.088)        | 0.650 (0.040)        | 0.898 (0.055)        |                      |
| A375    | LR                               | 0.999 (0.007)        | 0.999 (0.011)        | 0.993 (0.015)        | 0.994 (0.014)        | 0.990 (0.028)        | 0.997 (0.003)        | 0.990 (0.027)        |
|         | RF                               | 0.997 (0.007)        | 0.998 (0.008)        | 0.992 (0.015)        | 0.991 (0.015)        | 0.991 (0.028)        | 0.994 (0.009)        | 0.987 (0.028)        |
|         | SVM                              | 0.973 (0.010)        | 0.965 (0.015)        | 0.950 (0.019)        | 0.953 (0.018)        | 0.933 (0.025)        | 0.977 (0.009)        | 0.933 (0.024)        |
|         | GBDT                             | 0.998 (0.003)        | 0.999 (0.002)        | 0.990 (0.008)        | 0.991 (0.008)        | 0.983 (0.012)        | 0.999 (0.005)        | 0.982 (0.010)        |
|         | NetLapRLS(L1000) <sup>1</sup>    | 0.994 (0.006)        | 0.996 (0.005)        | 0.986 (0.013)        | 0.987 (0.013)        | 0.987 (0.022)        | 0.988 (0.007)        | 0.989 (0.026)        |
|         | NetLapRLS(PPI) <sup>2</sup>      | 0.993 (0.017)        | 0.995 (0.027)        | 0.978 (0.023)        | 0.979 (0.021)        | 0.973 (0.029)        | 0.986 (0.032)        | 0.971 (0.024)        |
|         | NetLapRLS(combined) <sup>3</sup> | 0.994 (0.007)        | 0.996 (0.007)        | 0.980 (0.021)        | 0.980 (0.017)        | 0.981 (0.025)        | 0.983 (0.016)        | 0.980 (0.021)        |
|         | EXP2SL(no BPR loss) <sup>4</sup> | 1.000 (0.008)        | 1.000 (0.010)        | 1.000 (0.015)        | 1.000 (0.014)        | 1.000 (0.021)        | 1.000 (0.007)        | 1.000 (0.020)        |
|         | EXP2SL(PPI) <sup>5</sup>         | 1.000 (0.010)        | 1.000 (0.010)        | <b>1.000 (0.016)</b> | <b>1.000 (0.014)</b> | <b>1.000 (0.016)</b> | 1.000 (0.021)        | <b>1.000 (0.025)</b> |
| EXP2SL  | <b>1.000 (0.009)</b>             | <b>1.000 (0.008)</b> | 0.999 (0.014)        | 0.999 (0.015)        | 0.998 (0.020)        | <b>1.000 (0.007)</b> | 0.997 (0.022)        |                      |
| HT29    | LR                               | 0.958 (0.021)        | 0.911 (0.037)        | <b>0.876 (0.020)</b> | <b>0.945 (0.010)</b> | <b>0.917 (0.045)</b> | 0.852 (0.038)        | <b>0.970 (0.015)</b> |
|         | RF                               | 0.949 (0.018)        | 0.891 (0.034)        | 0.846 (0.033)        | 0.931 (0.016)        | 0.872 (0.063)        | 0.849 (0.048)        | 0.956 (0.023)        |
|         | SVM                              | 0.928 (0.019)        | 0.838 (0.024)        | 0.821 (0.022)        | 0.920 (0.009)        | 0.837 (0.027)        | 0.836 (0.045)        | 0.943 (0.009)        |
|         | GBDT                             | 0.943 (0.010)        | 0.884 (0.029)        | 0.841 (0.028)        | 0.931 (0.011)        | 0.904 (0.037)        | 0.809 (0.041)        | 0.964 (0.014)        |
|         | NetLapRLS(L1000) <sup>1</sup>    | 0.929 (0.020)        | 0.857 (0.047)        | 0.828 (0.050)        | 0.922 (0.025)        | 0.858 (0.058)        | 0.823 (0.037)        | 0.949 (0.028)        |
|         | NetLapRLS(PPI) <sup>2</sup>      | 0.909 (0.018)        | 0.830 (0.033)        | 0.803 (0.033)        | 0.906 (0.015)        | 0.824 (0.051)        | 0.811 (0.037)        | 0.928 (0.019)        |
|         | NetLapRLS(combined) <sup>3</sup> | 0.920 (0.016)        | 0.847 (0.033)        | 0.822 (0.029)        | 0.917 (0.016)        | 0.858 (0.056)        | 0.816 (0.033)        | 0.942 (0.019)        |
|         | EXP2SL(no BPR loss) <sup>4</sup> | <b>0.960 (0.020)</b> | 0.913 (0.025)        | 0.872 (0.013)        | 0.940 (0.005)        | 0.891 (0.031)        | <b>0.875 (0.038)</b> | 0.954 (0.013)        |
|         | EXP2SL(PPI) <sup>5</sup>         | 0.959 (0.022)        | 0.916 (0.039)        | 0.870 (0.029)        | 0.942 (0.017)        | 0.908 (0.072)        | 0.854 (0.031)        | 0.965 (0.030)        |
| EXP2SL  | 0.960 (0.021)                    | <b>0.917 (0.046)</b> | 0.871 (0.038)        | 0.943 (0.021)        | 0.912 (0.048)        | 0.851 (0.038)        | 0.969 (0.028)        |                      |

<sup>1</sup> The NetLapRLS method using only the L1000 similarities

<sup>2</sup> The NetLapRLS method using only the PPI similarities

<sup>3</sup> The NetLapRLS method using the combination of L1000 and PPI similarities

<sup>4</sup> The EXP2SL model without the BPR loss

<sup>5</sup> The EXP2SL model with additional PPI information incorporated by a graph convolution module

**Table S2.** Performance evaluation in three different cell lines under the “split gene” setting, with labels selected by threshold 10%. The mean and standard deviation (in brackets) of each metrics over 10 repeats are shown. The best results for each cell line and each metric are marked in bold.

| Dataset | Model name                       | AUC                  | AUPR                 | F1                   | Accuracy             | Precision            | Sensitivity          | Specificity          |
|---------|----------------------------------|----------------------|----------------------|----------------------|----------------------|----------------------|----------------------|----------------------|
| A549    | LR                               | 0.682 (0.033)        | 0.423 (0.042)        | 0.440 (0.029)        | 0.684 (0.039)        | 0.401 (0.046)        | <b>0.593 (0.042)</b> | 0.689 (0.060)        |
|         | RF                               | 0.721 (0.028)        | 0.456 (0.039)        | 0.456 (0.031)        | 0.735 (0.059)        | 0.425 (0.051)        | 0.557 (0.057)        | 0.765 (0.082)        |
|         | SVM                              | 0.701 (0.034)        | 0.431 (0.044)        | 0.449 (0.027)        | 0.732 (0.038)        | 0.433 (0.045)        | 0.558 (0.055)        | 0.762 (0.060)        |
|         | GBDT                             | 0.702 (0.032)        | 0.428 (0.039)        | 0.439 (0.024)        | 0.716 (0.044)        | 0.385 (0.043)        | 0.560 (0.055)        | 0.741 (0.065)        |
|         | NetLapRLS(L1000) <sup>1</sup>    | 0.664 (0.030)        | 0.407 (0.037)        | 0.438 (0.023)        | 0.741 (0.053)        | 0.407 (0.044)        | 0.507 (0.049)        | 0.790 (0.076)        |
|         | NetLapRLS(PPI) <sup>2</sup>      | 0.636 (0.033)        | 0.335 (0.044)        | 0.386 (0.027)        | 0.636 (0.031)        | 0.306 (0.059)        | 0.581 (0.033)        | 0.636 (0.044)        |
|         | NetLapRLS(combined) <sup>3</sup> | 0.668 (0.031)        | 0.417 (0.042)        | 0.440 (0.029)        | 0.751 (0.051)        | 0.424 (0.053)        | 0.490 (0.053)        | <b>0.805 (0.076)</b> |
|         | EXP2SL(no BPR loss) <sup>4</sup> | 0.692 (0.035)        | 0.445 (0.047)        | 0.450 (0.031)        | 0.729 (0.032)        | 0.425 (0.037)        | 0.545 (0.053)        | 0.764 (0.051)        |
|         | EXP2SL(PPI) <sup>5</sup>         | <b>0.737 (0.030)</b> | 0.484 (0.041)        | 0.483 (0.028)        | 0.758 (0.040)        | <b>0.449 (0.052)</b> | 0.568 (0.037)        | 0.793 (0.061)        |
| EXP2SL  | 0.736 (0.033)                    | <b>0.486 (0.041)</b> | <b>0.485 (0.024)</b> | <b>0.762 (0.045)</b> | 0.447 (0.052)        | 0.565 (0.045)        | 0.801 (0.068)        |                      |
| A375    | LR                               | 0.923 (0.030)        | 0.871 (0.048)        | 0.880 (0.029)        | 0.900 (0.028)        | 0.848 (0.035)        | 0.951 (0.028)        | 0.864 (0.028)        |
|         | RF                               | 0.925 (0.020)        | 0.874 (0.034)        | 0.882 (0.012)        | 0.905 (0.018)        | 0.864 (0.029)        | 0.940 (0.011)        | 0.877 (0.022)        |
|         | SVM                              | 0.890 (0.044)        | 0.849 (0.062)        | 0.859 (0.033)        | 0.870 (0.034)        | 0.831 (0.045)        | 0.935 (0.027)        | 0.809 (0.050)        |
|         | GBDT                             | 0.911 (0.059)        | 0.868 (0.028)        | 0.892 (0.032)        | 0.902 (0.055)        | 0.868 (0.038)        | <b>0.960 (0.031)</b> | 0.862 (0.077)        |
|         | NetLapRLS(L1000) <sup>1</sup>    | 0.895 (0.033)        | 0.830 (0.050)        | 0.859 (0.028)        | 0.883 (0.029)        | 0.851 (0.054)        | 0.898 (0.033)        | 0.901 (0.060)        |
|         | NetLapRLS(PPI) <sup>2</sup>      | 0.901 (0.046)        | 0.847 (0.047)        | 0.866 (0.028)        | 0.888 (0.050)        | 0.869 (0.064)        | 0.895 (0.039)        | 0.911 (0.144)        |
|         | NetLapRLS(combined) <sup>3</sup> | 0.898 (0.029)        | 0.836 (0.047)        | 0.862 (0.038)        | 0.885 (0.036)        | 0.854 (0.044)        | 0.900 (0.045)        | 0.904 (0.026)        |
|         | EXP2SL(no BPR loss) <sup>4</sup> | 0.929 (0.044)        | 0.892 (0.067)        | 0.901 (0.047)        | 0.920 (0.043)        | 0.887 (0.047)        | 0.949 (0.030)        | 0.896 (0.030)        |
|         | EXP2SL(PPI) <sup>5</sup>         | <b>0.961 (0.029)</b> | <b>0.925 (0.037)</b> | <b>0.917 (0.030)</b> | <b>0.944 (0.031)</b> | <b>0.911 (0.029)</b> | 0.942 (0.036)        | <b>0.935 (0.035)</b> |
| EXP2SL  | 0.952 (0.033)                    | 0.905 (0.049)        | 0.900 (0.029)        | 0.931 (0.031)        | 0.880 (0.047)        | 0.947 (0.031)        | 0.918 (0.049)        |                      |
| HT29    | LR                               | 0.796 (0.035)        | 0.566 (0.059)        | 0.635 (0.066)        | 0.798 (0.031)        | 0.597 (0.067)        | 0.761 (0.085)        | 0.794 (0.041)        |
|         | RF                               | 0.842 (0.026)        | 0.592 (0.038)        | 0.659 (0.037)        | 0.827 (0.028)        | 0.611 (0.036)        | 0.768 (0.052)        | 0.833 (0.035)        |
|         | SVM                              | 0.815 (0.044)        | 0.549 (0.042)        | 0.639 (0.045)        | 0.791 (0.032)        | 0.552 (0.063)        | <b>0.851 (0.063)</b> | 0.760 (0.045)        |
|         | GBDT                             | 0.791 (0.029)        | 0.537 (0.039)        | 0.584 (0.039)        | 0.763 (0.039)        | 0.534 (0.067)        | 0.738 (0.035)        | 0.757 (0.052)        |
|         | NetLapRLS(L1000) <sup>1</sup>    | 0.798 (0.039)        | 0.592 (0.071)        | 0.645 (0.040)        | 0.821 (0.054)        | 0.609 (0.084)        | 0.736 (0.057)        | <b>0.843 (0.103)</b> |
|         | NetLapRLS(PPI) <sup>2</sup>      | 0.756 (0.035)        | 0.522 (0.042)        | 0.586 (0.027)        | 0.778 (0.031)        | 0.554 (0.026)        | 0.708 (0.075)        | 0.790 (0.056)        |
|         | NetLapRLS(combined) <sup>3</sup> | 0.791 (0.032)        | 0.585 (0.046)        | 0.626 (0.019)        | 0.809 (0.023)        | 0.603 (0.035)        | 0.719 (0.051)        | 0.830 (0.039)        |
|         | EXP2SL(no BPR loss) <sup>4</sup> | 0.816 (0.031)        | 0.600 (0.066)        | 0.672 (0.044)        | 0.824 (0.039)        | <b>0.646 (0.068)</b> | 0.770 (0.084)        | 0.828 (0.059)        |
|         | EXP2SL(PPI) <sup>5</sup>         | <b>0.852 (0.033)</b> | 0.642 (0.042)        | <b>0.680 (0.039)</b> | <b>0.836 (0.041)</b> | 0.630 (0.047)        | 0.796 (0.034)        | 0.838 (0.065)        |
| EXP2SL  | 0.851 (0.037)                    | <b>0.643 (0.045)</b> | 0.677 (0.034)        | 0.836 (0.027)        | 0.624 (0.060)        | 0.797 (0.080)        | 0.834 (0.049)        |                      |

<sup>1</sup> The NetLapRLS method using only the L1000 similarities<sup>2</sup> The NetLapRLS method using only the PPI similarities<sup>3</sup> The NetLapRLS method using the combination of L1000 and PPI similarities<sup>4</sup> The EXP2SL model without the BPR loss<sup>5</sup> The EXP2SL model with additional PPI information incorporated by a graph convolution module

**Table S3.** Top 10 over-represented GO biological process annotations among the top 50 important genes selected for cell line HT29, calculated using the WebGestalt server (Liao et al., 2019).

| Gene Set   | Description                                             | Size | Expect  | Ratio  | P Value   | FDR        |
|------------|---------------------------------------------------------|------|---------|--------|-----------|------------|
| GO:0048661 | positive regulation of smooth muscle cell proliferation | 82   | 0.21157 | 28.360 | 6.2110e-8 | 0.00020357 |
| GO:0000302 | response to reactive oxygen species                     | 215  | 0.55472 | 14.422 | 6.6248e-8 | 0.00020357 |
| GO:0042981 | regulation of apoptotic process                         | 1517 | 3.9140  | 4.3434 | 7.8291e-8 | 0.00020357 |
| GO:0043067 | regulation of programmed cell death                     | 1531 | 3.9501  | 4.3036 | 8.9571e-8 | 0.00020357 |
| GO:1901701 | cellular response to oxygen-containing compound         | 1074 | 2.7710  | 5.0523 | 2.6263e-7 | 0.00032465 |
| GO:0010941 | regulation of cell death                                | 1649 | 4.2546  | 3.9957 | 2.6354e-7 | 0.00032465 |
| GO:0043065 | positive regulation of apoptotic process                | 606  | 1.5635  | 7.0353 | 2.6751e-7 | 0.00032465 |
| GO:0043068 | positive regulation of programmed cell death            | 610  | 1.5739  | 6.9892 | 2.8569e-7 | 0.00032465 |
| GO:0006915 | apoptotic process                                       | 1912 | 4.9332  | 3.6488 | 3.9245e-7 | 0.00039642 |
| GO:0034599 | cellular response to oxidative stress                   | 278  | 0.71727 | 11.153 | 4.7381e-7 | 0.00043074 |

**Table S4.** Top 10 over-represented GO biological process annotations among the top 50 important genes selected for cell line A375, calculated using the WebGestalt server (Liao et al., 2019).

| Gene Set   | Description                                               | Size | Expect  | Ratio  | P Value      | FDR      |
|------------|-----------------------------------------------------------|------|---------|--------|--------------|----------|
| GO:0071260 | cellular response to mechanical stimulus                  | 78   | 0.22933 | 21.803 | 0.0000032011 | 0.019405 |
| GO:0031400 | negative regulation of protein modification process       | 560  | 1.6465  | 6.0736 | 0.0000042691 | 0.019405 |
| GO:0051254 | positive regulation of RNA metabolic process              | 1668 | 4.9041  | 3.2626 | 0.000012751  | 0.028595 |
| GO:0001933 | negative regulation of protein phosphorylation            | 385  | 1.1319  | 7.0675 | 0.000014854  | 0.028595 |
| GO:0009057 | macromolecule catabolic process                           | 1338 | 3.9339  | 3.5588 | 0.000020042  | 0.028595 |
| GO:0032269 | negative regulation of cellular protein metabolic process | 983  | 2.8901  | 4.1521 | 0.000020061  | 0.028595 |
| GO:0007568 | aging                                                     | 303  | 0.89086 | 7.8576 | 0.000027348  | 0.028595 |
| GO:0042326 | negative regulation of phosphorylation                    | 423  | 1.2437  | 6.4326 | 0.000029192  | 0.028595 |
| GO:0009612 | response to mechanical stimulus                           | 207  | 0.60860 | 9.8586 | 0.000030597  | 0.028595 |
| GO:0051248 | negative regulation of protein metabolic process          | 1044 | 3.0695  | 3.9095 | 0.000036402  | 0.028595 |

**Table S5.** Top 10 over-represented GO biological process annotations among the top 50 important genes selected for cell line A549, calculated using the WebGestalt server (Liao et al., 2019).

| Gene Set   | Description                                           | Size | Expect  | Ratio  | P Value      | FDR      |
|------------|-------------------------------------------------------|------|---------|--------|--------------|----------|
| GO:0043535 | regulation of blood vessel endothelial cell migration | 88   | 0.26401 | 18.939 | 0.0000064300 | 0.058455 |
| GO:0043534 | blood vessel endothelial cell migration               | 112  | 0.33601 | 14.880 | 0.000020861  | 0.094825 |
| GO:0071216 | cellular response to biotic stimulus                  | 222  | 0.66603 | 9.0086 | 0.000050863  | 0.10038  |
| GO:0033673 | negative regulation of kinase activity                | 237  | 0.71103 | 8.4385 | 0.000073096  | 0.10038  |
| GO:0009607 | response to biotic stimulus                           | 926  | 2.7781  | 3.9595 | 0.000074342  | 0.10038  |
| GO:0010594 | regulation of endothelial cell migration              | 151  | 0.45302 | 11.037 | 0.000087157  | 0.10038  |
| GO:0010243 | response to organonitrogen compound                   | 945  | 2.8351  | 3.8799 | 0.000089213  | 0.10038  |
| GO:0030336 | negative regulation of cell migration                 | 252  | 0.75603 | 7.9362 | 0.00010249   | 0.10038  |
| GO:1901700 | response to oxygen-containing compound                | 1556 | 4.6682  | 2.9990 | 0.00013465   | 0.10038  |
| GO:0051348 | negative regulation of transferase activity           | 266  | 0.79803 | 7.5185 | 0.00013778   | 0.10038  |

**Table S6.** Top 10 over-represented KEGG pathways among the top 50 important genes selected for cell line HT29, calculated using the WebGestalt server (Liao et al., 2019).

| Gene Set | Description                     | Size | Expect  | Ratio  | P Value     | FDR       |
|----------|---------------------------------|------|---------|--------|-------------|-----------|
| hsa05212 | Pancreatic cancer               | 75   | 0.30125 | 16.598 | 0.000010453 | 0.0024818 |
| hsa04012 | ErbB signaling pathway          | 85   | 0.34141 | 14.645 | 0.000019317 | 0.0024818 |
| hsa05200 | Pathways in cancer              | 526  | 2.1127  | 4.7332 | 0.000022839 | 0.0024818 |
| hsa04510 | Focal adhesion                  | 199  | 0.79930 | 7.5065 | 0.00011544  | 0.0073771 |
| hsa05223 | Non-small cell lung cancer      | 66   | 0.26510 | 15.089 | 0.00012823  | 0.0073771 |
| hsa05214 | Glioma                          | 71   | 0.28518 | 14.026 | 0.00017048  | 0.0073771 |
| hsa05218 | Melanoma                        | 72   | 0.28920 | 13.831 | 0.00018001  | 0.0073771 |
| hsa04915 | Estrogen signaling pathway      | 137  | 0.55027 | 9.0864 | 0.00019014  | 0.0073771 |
| hsa05220 | Chronic myeloid leukemia        | 76   | 0.30526 | 13.104 | 0.00022199  | 0.0073771 |
| hsa05163 | Human cytomegalovirus infection | 225  | 0.90374 | 6.6391 | 0.00022629  | 0.0073771 |

**Table S7.** Top 10 over-represented KEGG pathways among the top 50 important genes selected for cell line A375, calculated using the WebGestalt server (Liao et al., 2019)

| Gene Set | Description                              | Size | Expect   | Ratio  | P Value     | FDR        |
|----------|------------------------------------------|------|----------|--------|-------------|------------|
| hsa04218 | Cellular senescence                      | 160  | 0.53555  | 13.071 | 6.3096e-7   | 0.00020569 |
| hsa05170 | Human immunodeficiency virus 1 infection | 212  | 0.70960  | 8.4555 | 0.000054914 | 0.0089510  |
| hsa04620 | Toll-like receptor signaling pathway     | 104  | 0.34811  | 11.491 | 0.00035831  | 0.038936   |
| hsa05145 | Toxoplasmosis                            | 113  | 0.37823  | 10.576 | 0.00049166  | 0.040070   |
| hsa04110 | Cell cycle                               | 124  | 0.41505  | 9.6374 | 0.00069878  | 0.045353   |
| hsa04926 | Relaxin signaling pathway                | 130  | 0.43513  | 9.1926 | 0.00083471  | 0.045353   |
| hsa05166 | Human T-cell leukemia virus 1 infection  | 255  | 0.85353  | 5.8580 | 0.0013522   | 0.062974   |
| hsa04115 | p53 signaling pathway                    | 72   | 0.24100  | 12.448 | 0.0016967   | 0.069124   |
| hsa05212 | Pancreatic cancer                        | 75   | 0.25104  | 11.950 | 0.0019083   | 0.069124   |
| hsa00900 | Terpenoid backbone biosynthesis          | 22   | 0.073638 | 27.16  | 0.0023849   | 0.077747   |

**Table S8.** Top 10 over-represented KEGG pathways among the top 50 important genes selected for cell line A549, calculated using the WebGestalt server (Liao et al., 2019)

| Gene Set | Description                       | Size | Expect  | Ratio  | P Value   | FDR     |
|----------|-----------------------------------|------|---------|--------|-----------|---------|
| hsa04919 | Thyroid hormone signaling pathway | 116  | 0.52805 | 7.5751 | 0.0017879 | 0.18261 |
| hsa04110 | Cell cycle                        | 124  | 0.56447 | 7.0863 | 0.0022831 | 0.18261 |
| hsa05160 | Hepatitis C                       | 131  | 0.59633 | 6.7077 | 0.0027882 | 0.18261 |
| hsa05162 | Measles                           | 132  | 0.60088 | 6.6569 | 0.0028661 | 0.18261 |
| hsa05211 | Renal cell carcinoma              | 69   | 0.31410 | 9.5512 | 0.0036789 | 0.18261 |
| hsa05165 | Human papillomavirus infection    | 339  | 1.5432  | 3.8881 | 0.0038256 | 0.18261 |
| hsa05161 | Hepatitis B                       | 144  | 0.65551 | 6.1021 | 0.0039211 | 0.18261 |
| hsa05220 | Chronic myeloid leukemia          | 76   | 0.34596 | 8.6714 | 0.0048304 | 0.19684 |
| hsa04218 | Cellular senescence               | 160  | 0.72834 | 5.4919 | 0.0057019 | 0.20653 |
| hsa04012 | ErbB signaling pathway            | 85   | 0.38693 | 7.7533 | 0.0066003 | 0.21517 |



---

## REFERENCES

- Lei, T., Zhang, Y., Wang, S. I., Dai, H., and Artzi, Y. (2018). Simple recurrent units for highly parallelizable recurrence. In *Proceedings of the 2018 Conference on Empirical Methods in Natural Language Processing*. 4470–4481
- Liao, Y., Wang, J., Jaehnig, E. J., Shi, Z., and Zhang, B. (2019). Webgestalt 2019: gene set analysis toolkit with revamped UIs and APIs. *Nucleic acids research*
- Subramanian, A., Narayan, R., Corsello, S. M., Peck, D. D., Natoli, T. E., Lu, X., et al. (2017). A next generation connectivity map: L1000 platform and the first 1,000,000 profiles. *Cell* 171, 1437–1452
- Szklarczyk, D., Franceschini, A., Wyder, S., Forslund, K., Heller, D., Huerta-Cepas, J., et al. (2014). STRING v10: protein–protein interaction networks, integrated over the tree of life. *Nucleic acids research* 43, D447–D452
